# Supplementary material
Source: Springer Nature journal article supplement (https://www.springermedizin.de/resource/supplementary/12936_2014_3278_MOESM11_ESM.pdf/9545484)
Supplement: MOESM11 [file 9545484]

| <i>Morbidity/ mortality</i> | <b>Random sequence generation</b> | <b>Allocation concealment</b> | <b>Blinding of participants and personnel</b> | <b>Blinding of outcome assessment</b> | <b>Incomplete outcome data</b> | <b>Selective reporting</b> | <b>Other bias</b> |
|-----------------------------|-----------------------------------|-------------------------------|-----------------------------------------------|---------------------------------------|--------------------------------|----------------------------|-------------------|
| Elmardi 2009                | -                                 | -                             | -                                             | -                                     | ?                              | +                          | -                 |
| Mubi 2011                   | +                                 | +                             | -                                             | -                                     | +                              | +                          | ?                 |
| Rutta 2012                  | -                                 | -                             | -                                             | -                                     | ?                              | +                          | +                 |
| Thiam 2012                  | -                                 | -                             | -                                             | ?                                     | ?                              | ?                          | ?                 |
